# Supplementary material for: Anomalous thermal expansion of strontium squarate trihydrate induced by hydrogen-bond weakening
Source: Royal Society of Chemistry journal article supplement (doi:10.1039/d2qi02274e), 2022-11-23
Supplement: d2qi02274e1.pdf [file d2qi02274e1.pdf]

## Supporting Information

### **Anomalous Thermal Expansion of Strontium Squarate Trihydrate Induced by Hydrogen-bond Weakening**

Zhanning Liu,<sup>a, c\*</sup> Zhe Wang,<sup>b</sup> Chengyong Xing,<sup>a</sup> Jian Tian<sup>a</sup> and Xianran Xing<sup>d</sup>

- a. School of Materials Science and Engineering, Shandong University of Science and Technology, Qingdao, 266590, China.
- b. School of Materials Science and Engineering, China University of Petroleum (East China), Qingdao, Shandong, 266580, China.
- c. State Key Laboratory of Structural Chemistry, Fujian Institute of Research on the Structure of Matter, Chinese Academy of Sciences, Fuzhou, Fujian 350002, China.
- d. Beijing Advanced Innovation Center for Materials Genome Engineering, Institute of Solid State Chemistry, University of Science and Technology Beijing, Beijing, 100083, China.

# Contents

|                                                                                                                           |   |
|---------------------------------------------------------------------------------------------------------------------------|---|
| Figure S1 TG-DSC curve of Sr-sq.....                                                                                      | 3 |
| Figure S2 <i>In situ</i> VT-PXRD patterns of Sr-sq upon heating under N <sub>2</sub> .....                                | 3 |
| Figure S3 Le Bail fitting pattern of Sr-sq (at 300K), the fitting result is $R_{wp} = 7.2%$ , $R_p = 5%$ ...4             | 4 |
| Figure S4 Temperature dependent lattice constant changes of the monoclinic phase Sr-sq obtained from Le Bail fitting..... | 5 |
| Figure S5 Illustration of the relationship between principal axes (blue lines) and orthorhombic axes (black arrows). .... | 5 |
| Table S1 Crystallographic data of compound Sr-sq at different temperatures.....                                           | 6 |
| Table S2 Bond lengths of Sr-sq at different temperatures.....                                                             | 7 |
| Table S3 Temperature dependent angle changes of $\varphi_1$ and $\varphi_2$ .....                                         | 7 |
| Figure S6 Temperature dependent low frequency (below 200 cm <sup>-1</sup> ) Raman mode shifts. ....                       | 8 |
| Figure S7 Experimental measured (black) and DFT calculated (red) Raman spectrum of Sr-sq. ....                            | 8 |

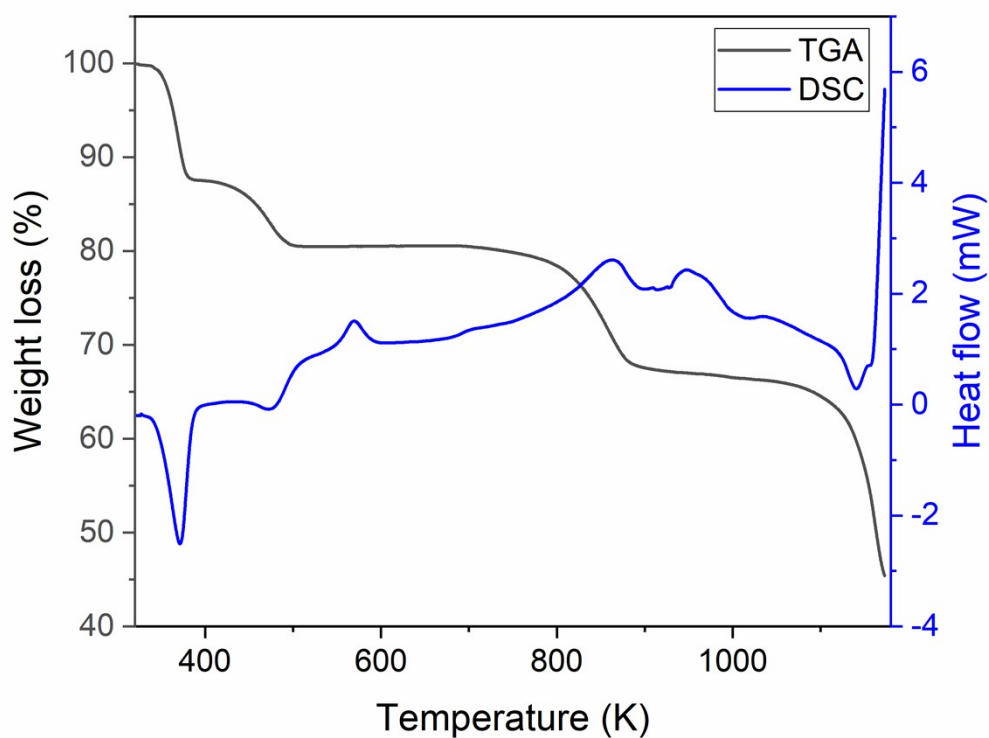

**Figure S1** TG-DSC curve of Sr-sq.

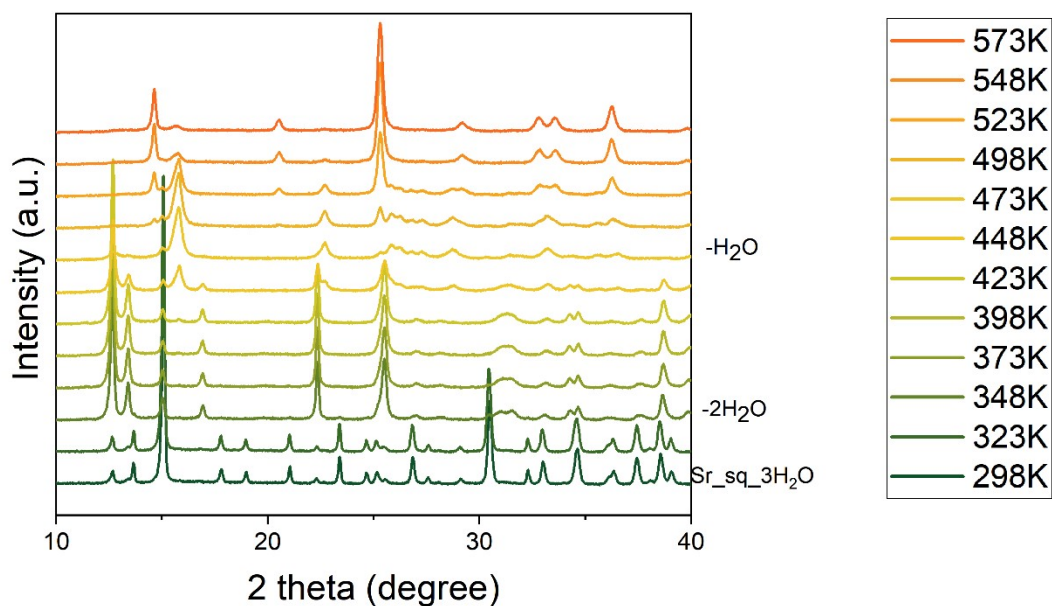

**Figure S2** *In situ* VT-PXRD patterns of Sr-sq upon heating under N<sub>2</sub>.

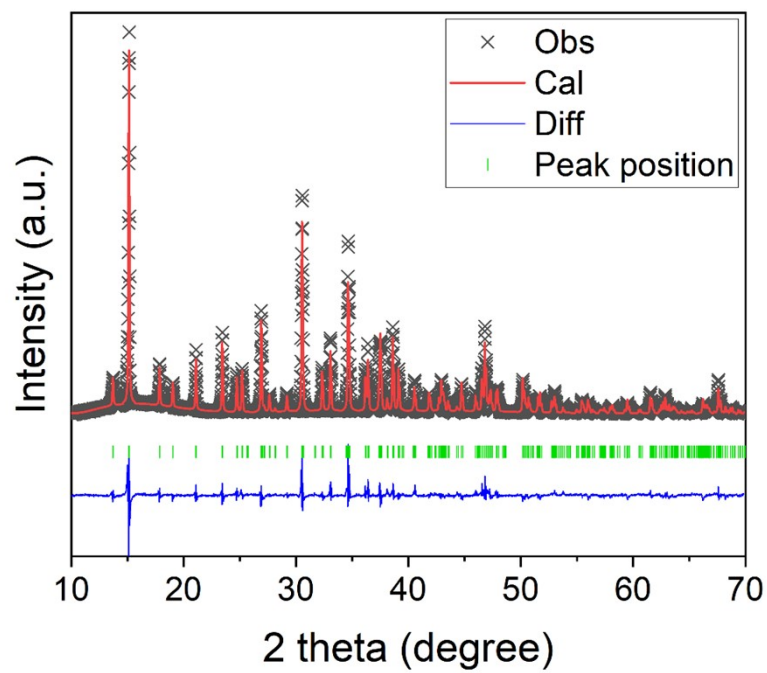

**Figure S3** Leball fitting pattern of **Sr-sq** (at 300K), the fitting result is  $R_{wp} = 7.2\%$ ,  $R_p = 5\%$ .

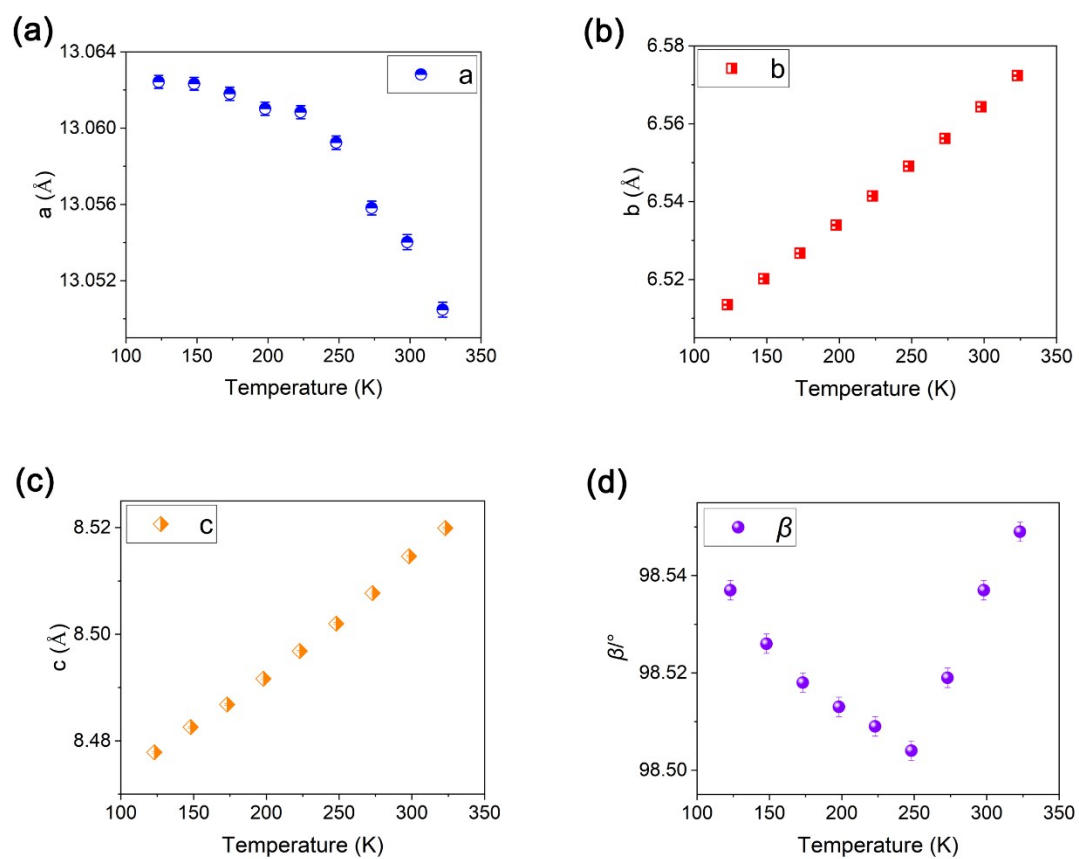

**Figure S4** Temperature dependent lattice constant changes of the monoclinic phase Sr-sq obtained from Le Bail fitting.

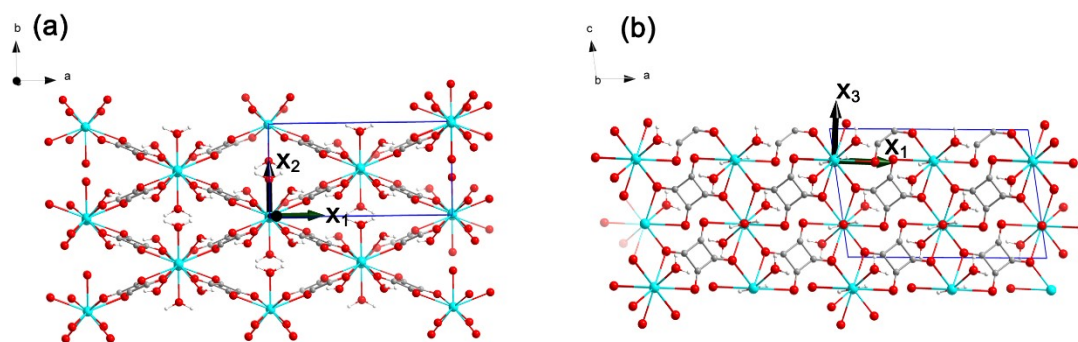

**Figure S5** Illustration of the relationship between principal axes (blue lines) and orthorhombic axes (black arrows).

**Table S1** Crystallographic data of compound **Sr-sq** at different temperatures.

| Identification code                         | 100 K                                                                 | 150 K                                                                 | 200 K                                                                 | 250 K                                                                 | 300 K                                                                 |
|---------------------------------------------|-----------------------------------------------------------------------|-----------------------------------------------------------------------|-----------------------------------------------------------------------|-----------------------------------------------------------------------|-----------------------------------------------------------------------|
| Empirical formula                           | C <sub>4</sub> H <sub>6</sub> O <sub>7</sub> Sr                       |
| Formula weight                              | 253.71                                                                | 253.71                                                                | 253.71                                                                | 253.71                                                                | 253.71                                                                |
| Temperature/K                               | 100.09(10)                                                            | 149.99(10)                                                            | 199.96(10)                                                            | 249.99(10)                                                            | 299.94(10)                                                            |
| Crystal system                              | monoclinic                                                            | monoclinic                                                            | monoclinic                                                            | monoclinic                                                            | monoclinic                                                            |
| Space group                                 | C2/c                                                                  | C2/c                                                                  | C2/c                                                                  | C2/c                                                                  | C2/c                                                                  |
| a/Å                                         | 13.0755(7)                                                            | 13.0683(7)                                                            | 13.0650(7)                                                            | 13.0653(7)                                                            | 13.0565(8)                                                            |
| b/Å                                         | 6.4945(3)                                                             | 6.5081(3)                                                             | 6.5257(3)                                                             | 6.5462(3)                                                             | 6.5688(3)                                                             |
| c/Å                                         | 8.4711(5)                                                             | 8.4763(4)                                                             | 8.4886(4)                                                             | 8.5027(4)                                                             | 8.5163(5)                                                             |
| $\alpha$ /°                                 | 90                                                                    | 90                                                                    | 90                                                                    | 90                                                                    | 90                                                                    |
| $\beta$ /°                                  | 98.628(6)                                                             | 98.566(5)                                                             | 98.534(6)                                                             | 98.518(6)                                                             | 98.506(6)                                                             |
| $\gamma$ /°                                 | 90                                                                    | 90                                                                    | 90                                                                    | 90                                                                    | 90                                                                    |
| Volume/Å <sup>3</sup>                       | 711.22(7)                                                             | 712.87(6)                                                             | 715.71(6)                                                             | 719.19(6)                                                             | 722.37(7)                                                             |
| Z                                           | 4                                                                     | 4                                                                     | 4                                                                     | 4                                                                     | 4                                                                     |
| $\rho_{\text{calc}}$ /g/cm <sup>3</sup>     | 2.343                                                                 | 2.343                                                                 | 2.343                                                                 | 2.343                                                                 | 2.343                                                                 |
| $\mu$ /mm <sup>-1</sup>                     | 7.580                                                                 | 7.496                                                                 | 7.496                                                                 | 7.496                                                                 | 7.496                                                                 |
| F(000)                                      | 496.0                                                                 | 496.0                                                                 | 496.0                                                                 | 496.0                                                                 | 496.0                                                                 |
| Crystal size/mm <sup>3</sup>                | 0.1 × 0.1 ×<br>0.1                                                    |
| Radiation                                   | MoK $\alpha$ ( $\lambda$ =<br>0.71073)                                |
| 2 $\theta$ range for data<br>collection/°   | 8.27 to<br>59.28                                                      | 8.26 to<br>59.368                                                     | 8.246 to<br>59.326                                                    | 8.226 to<br>59.262                                                    | 8.742 to<br>59.222                                                    |
| Index ranges                                | -17 ≤ h ≤<br>15, -8 ≤ k ≤<br>8, -10 ≤ l ≤<br>11                       | -17 ≤ h ≤<br>17, -8 ≤ k ≤<br>8, -10 ≤ l ≤<br>11                       | -18 ≤ h ≤<br>17, -8 ≤ k ≤<br>8, -11 ≤ l ≤<br>11                       | -17 ≤ h ≤<br>18, -9 ≤ k ≤<br>8, -11 ≤ l ≤<br>11                       | -15 ≤ h ≤<br>16, -9 ≤ k ≤<br>8, -11 ≤ l ≤<br>11                       |
| Reflections collected                       | 3649                                                                  | 3444                                                                  | 3513                                                                  | 3470                                                                  | 3728                                                                  |
| Independent reflections                     | 896 [R <sub>int</sub> =<br>0.0356,<br>R <sub>sigma</sub> =<br>0.0294] | 899 [R <sub>int</sub> =<br>0.0373,<br>R <sub>sigma</sub> =<br>0.0324] | 911 [R <sub>int</sub> =<br>0.0397,<br>R <sub>sigma</sub> =<br>0.0333] | 902 [R <sub>int</sub> =<br>0.0384,<br>R <sub>sigma</sub> =<br>0.0325] | 901 [R <sub>int</sub> =<br>0.0469,<br>R <sub>sigma</sub> =<br>0.0383] |
| Data/restraints/parameters                  | 896/2/68                                                              | 899/0/68                                                              | 911/1/58                                                              | 902/1/58                                                              | 901/1/58                                                              |
| Goodness-of-fit on F <sup>2</sup>           | 1.153                                                                 | 1.144                                                                 | 1.220                                                                 | 1.197                                                                 | 1.274                                                                 |
| Final R indexes [I > 2 $\sigma$ (I)]        | R <sub>1</sub> = 0.0263,<br>wR <sub>2</sub> =<br>0.0654               | R <sub>1</sub> = 0.0303,<br>wR <sub>2</sub> =<br>0.0738               | R <sub>1</sub> = 0.0379,<br>wR <sub>2</sub> =<br>0.0939               | R <sub>1</sub> = 0.0377,<br>wR <sub>2</sub> =<br>0.0946               | R <sub>1</sub> = 0.0391,<br>wR <sub>2</sub> =<br>0.0972               |
| Final R indexes [all data]                  | R <sub>1</sub> = 0.0272,<br>wR <sub>2</sub> =<br>0.0658               | R <sub>1</sub> = 0.0310,<br>wR <sub>2</sub> =<br>0.0743               | R <sub>1</sub> = 0.0391,<br>wR <sub>2</sub> =<br>0.0947               | R <sub>1</sub> = 0.0389,<br>wR <sub>2</sub> =<br>0.0953               | R <sub>1</sub> = 0.0404,<br>wR <sub>2</sub> =<br>0.0979               |
| Largest diff. peak/hole / e Å <sup>-3</sup> | 0.66/-1.37                                                            | 0.48/-1.64                                                            | 0.69/-2.04                                                            | 0.81/-2.31                                                            | 0.84/-2.28                                                            |
| CCDC number                                 | 2191456                                                               | 2191453                                                               | 2191454                                                               | 2191452                                                               | 2191455                                                               |

**Table S2** Distances of Sr-sq at different temperatures.

|         | 100K  | 150K  | 200K  | 250K  | 300K  |
|---------|-------|-------|-------|-------|-------|
| Sr-O1   | 2.540 | 2.544 | 2.541 | 2.545 | 2.548 |
| Sr-O2   | 2.673 | 2.678 | 2.682 | 2.686 | 2.687 |
| Sr-O3   | 2.534 | 2.535 | 2.535 | 2.536 | 2.539 |
| Sr-O4   | 2.847 | 2.848 | 2.847 | 2.850 | 2.849 |
| C1-C2   | 1.463 | 1.459 | 1.461 | 1.461 | 1.460 |
| C1-O3   | 1.259 | 1.253 | 1.257 | 1.254 | 1.255 |
| C2-O4   | 1.259 | 1.260 | 1.260 | 1.257 | 1.257 |
| O1...O2 | 2.802 | 2.804 | 2.807 | 2.814 | 2.820 |

**Table S3** Temperature dependent angle changes of  $\varphi_1$  and  $\varphi_2$ 

| Temperature (K) | $\varphi_1(^{\circ})$ | $\varphi_2(^{\circ})$ |
|-----------------|-----------------------|-----------------------|
| 100             | 90.13(8)              | 127.17(1)             |
| 150             | 89.92(8)              | 127.05(1)             |
| 200             | 89.57(11)             | 126.92(1)             |
| 250             | 89.38(11)             | 126.78(1)             |
| 300             | 89.03(11)             | 126.59(1)             |

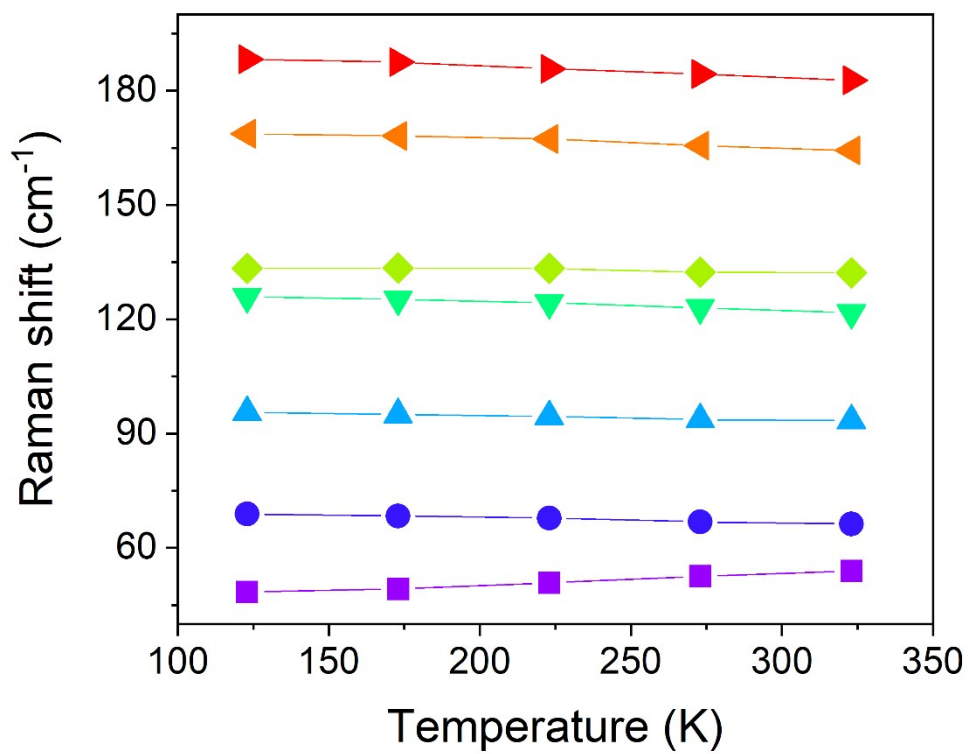

**Figure S6** Temperature dependent low frequency (below 200  $\text{cm}^{-1}$ ) Raman mode shifts.

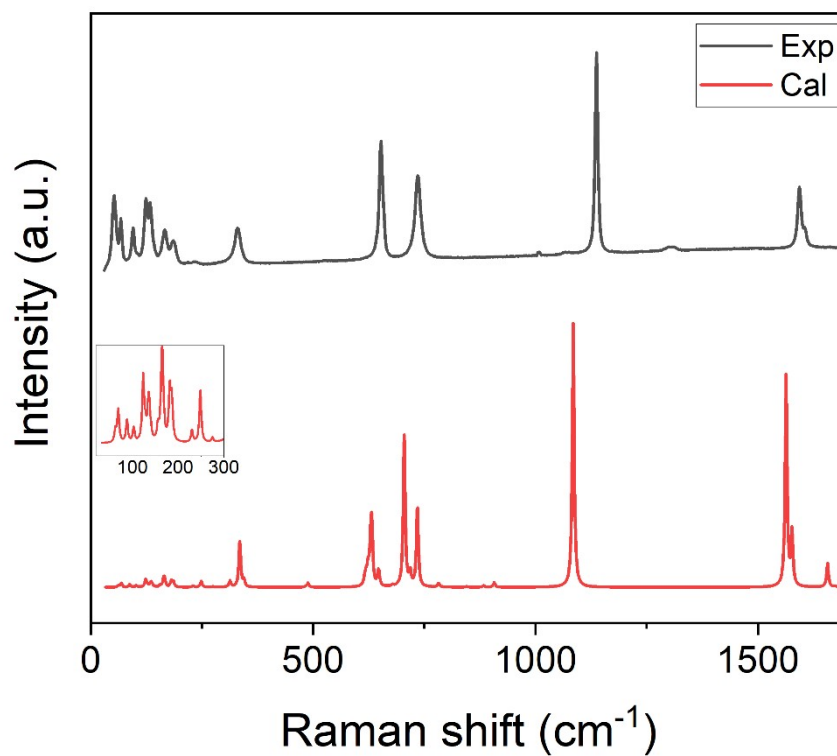

**Figure S7** Experimental measured (black) and DFT calculated (red) Raman spectrum of Sr-sq.
